# Supplementary material
Source: MDPI journal article supplement (https://www.mdpi.com/2077-1312/11/1/101)
Supplement: s1 [file s1]

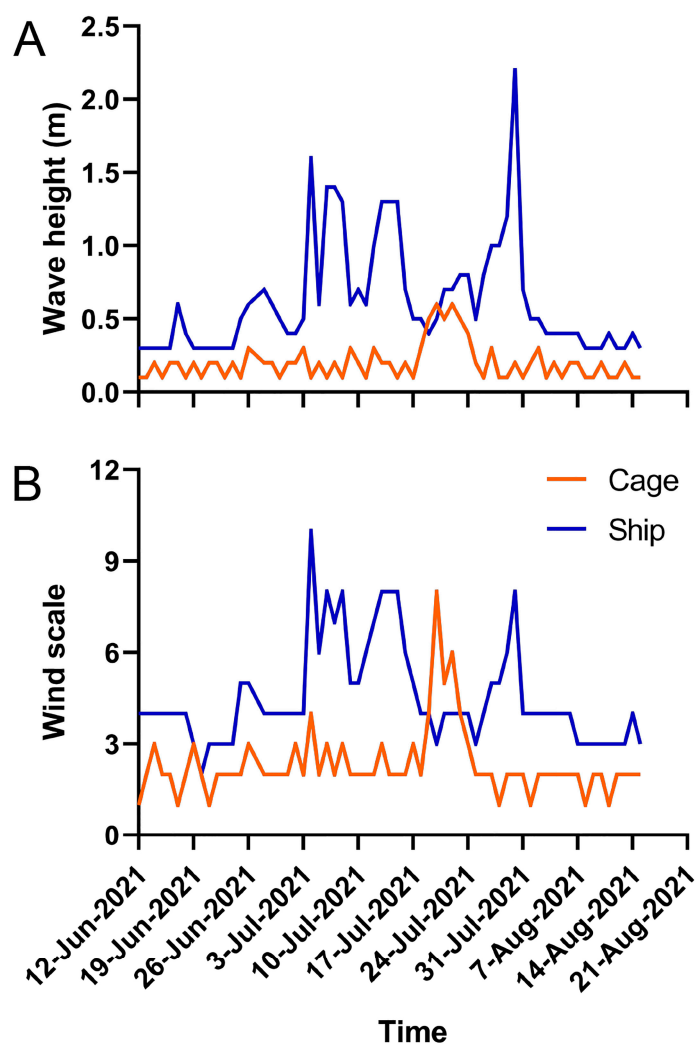

**Figure S1.** Wave height (A) and wind scale (B) in the nearshore cages (denoted in orange) and offshore ship (denoted in blue) throughout the experiment period.
